# Supplementary material
Source: publisher figshare collection journal article supplement (https://acs.figshare.com/ndownloader/files/4265359)
Supplement: Supplementary file 1 [file 4265359]

## Supporting information

Detailed aspects of the data analysis of the light scattering:

In the DLS experiment,  $G_2(t)$  can be converted into a correlation function of the scattered electric field,  $g_1(t)$ , using the Siegert's relationship.<sup>1,2</sup> For monodisperse particles, having smaller diameter compared to the wavelength of light as well as for hard spheres of any size, the relaxation time of  $g_1(t)$ ,  $\tau$ , is related to the relaxation rate of  $g_1(t)$ ,  $\Gamma$ , and the translation diffusion coefficient,  $D$ , by the relationship

$$g_1(t) = e^{-t/\tau} = e^{-\Gamma t} = e^{-Dq^2 t} \quad \text{and} \quad \Gamma = \tau^{-1} = Dq^2 \quad (1)$$

The hydrodynamic radii of particles can thus be obtained from the diffusion coefficient,  $D$ , via the Stokes-Einstein equation

$$R_h = \frac{kT}{6\pi\eta_o D} \quad (2)$$

where  $k$ ,  $T$  and  $\eta_o$  are the Boltzmann constant, the absolute temperature and the solvent viscosity.

Mean peak values of the size distributions, obtained at fixed  $q$  and  $c$ , were used to estimate the apparent hydrodynamic radii,  $R_h^{\text{app}}$ . The true hydrodynamic radius,  $R_h$ , as well as the true radius of gyration,  $R_g$ , were then obtained by extrapolating to  $q = 0$  and  $c = 0$ . Decay rates of  $g_1(t)$  were calculated from  $R_h^{\text{app}}$ .

---

<sup>1</sup> Schärfl, W. *Light Scattering from Polymer Solutions and Nanoparticle Dispersions*, Springer Verlag, Berlin Heidelberg, **2007**.

<sup>2</sup> Brown, W. *Dynamic Light Scattering: The Method and Some Application*; Claredon Press, Oxford, **1993**.

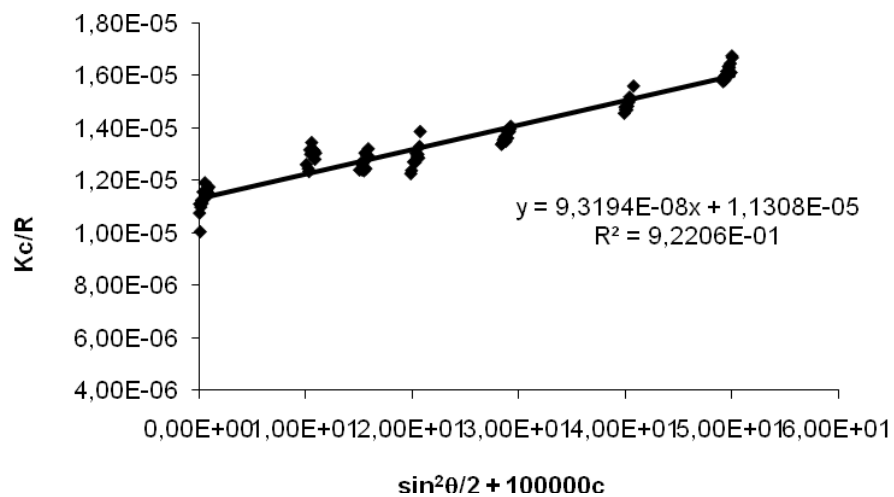

**Figure S1** SLS data for star like poly(*n*-butyl acrylate) macroinitiator in THF.

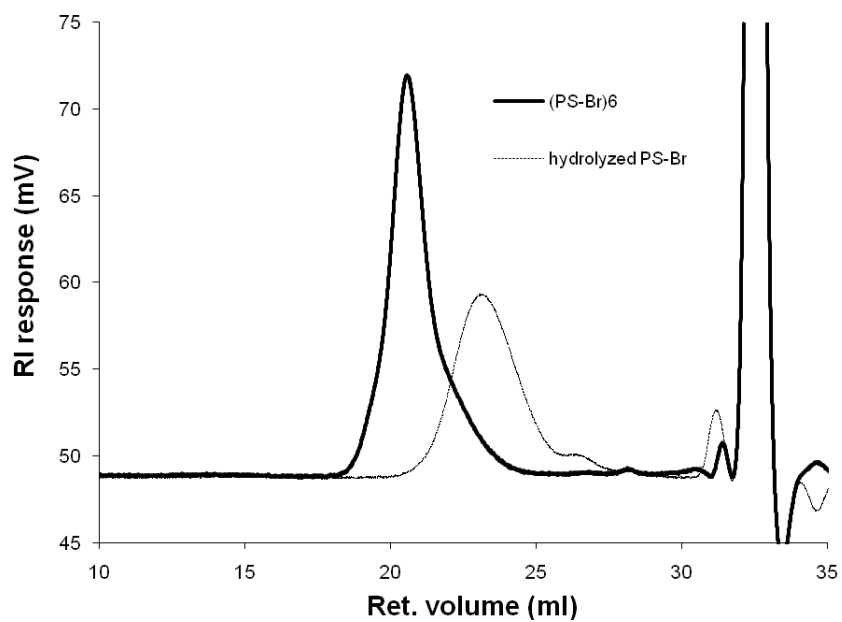

**Figure S2** SEC traces of polystyrene star macroinitiator and corresponding hydrolyzed chains using THF as eluent (0.8 ml/min flow rate).

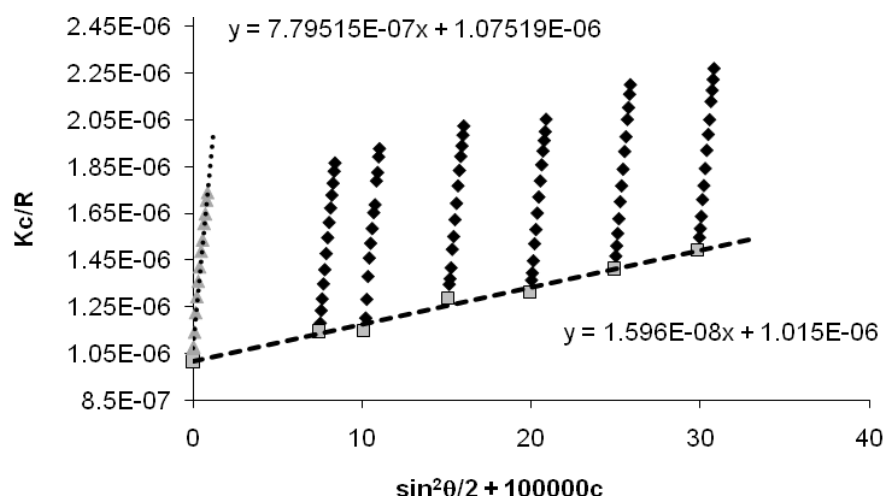

**Figure S3** Angular dependence of star block copolymer (PBuA-PDAEMA)<sub>6</sub> in THF.

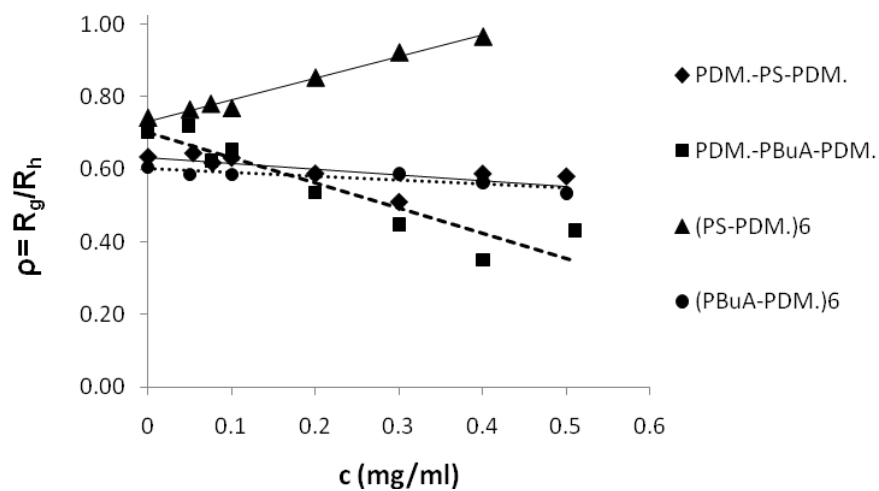

**Figure S4** Ratio of radii of gyration and hydrodynamic radii ( $R_g/R_h$ ) for polymer micelles (0.05 M NaCl).

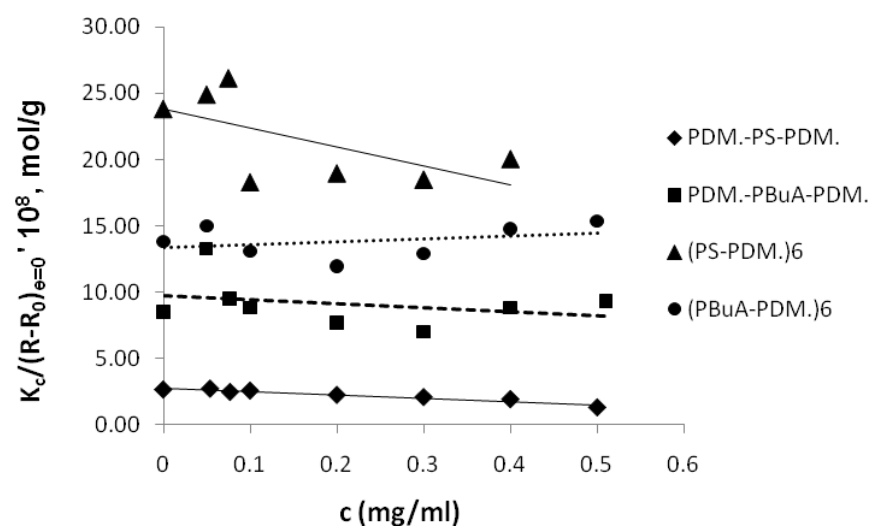

**Figure S5**  $K_c/(R-R_0)_{\theta=0}$  curve for polymer micelles (0.05 M NaCl).

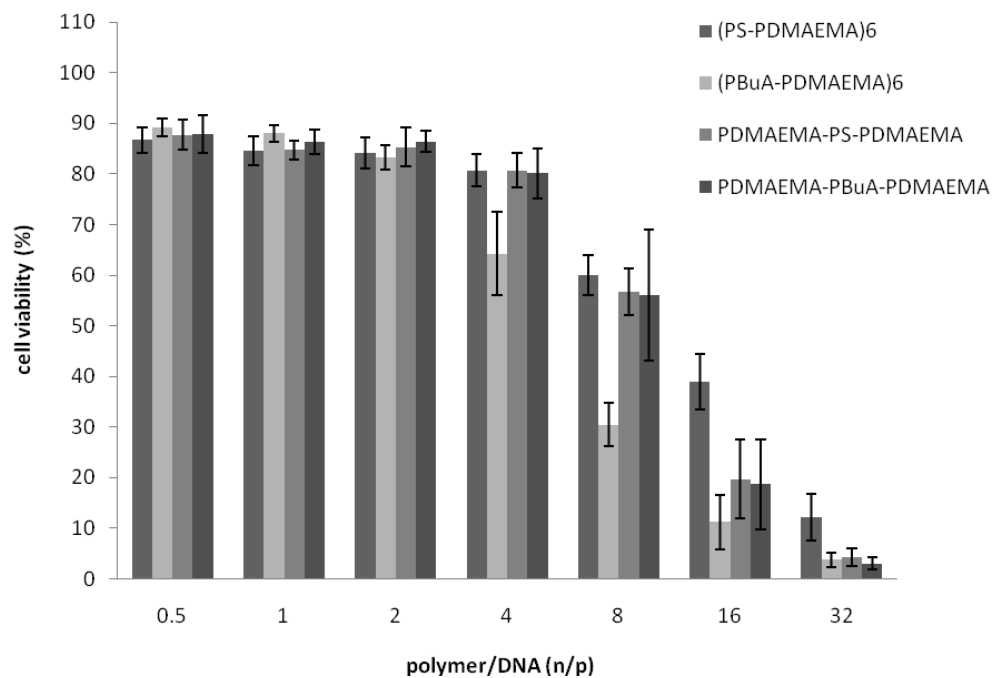

**Figure S6** Cytotoxicity evaluation of polymer/DNA complexes in ARPE19 cells at n/p ratios 0.5 – 32. The percentage of cell viability is an average of three independent experiments  $\pm$  sem.

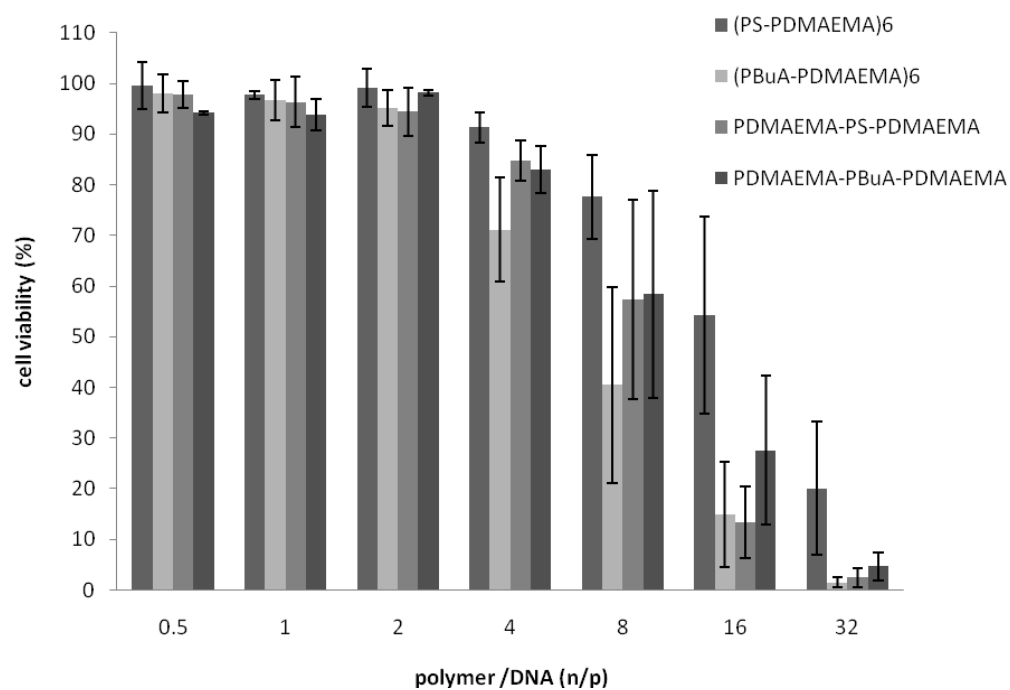

**Figure S7** Cytotoxicity evaluation of polymer/DNA complexes in CV1-P cells at n/p ratios 0.5 – 32. The percentage of cell viability is an average of three independent experiments  $\pm$  sem.
